# Supplementary material for: Proficiency testing for determination of lead and arsenic in cosmetics: comparison of analytical procedures and evaluation of laboratory performances
Source: Royal Society of Chemistry journal article supplement (doi:10.1039/c5ay00315f), 2015-01-01
Supplement: c5ay00315f1.pdf [file c5ay00315f1.pdf]

## Supplementary Data

### **Proficiency testing for determination of lead and arsenic in cosmetics: Comparison of analytical procedures and evaluation of laboratory performances**

Zhixiong Zhong <sup>a\*</sup>, Gongke Li <sup>b</sup>, Jianbo Luo <sup>a</sup>, Wensheng Chen <sup>a</sup>, Liping Liu <sup>a</sup>, Ping He <sup>c</sup>,  
Zhibin Luo <sup>a</sup>

*<sup>a</sup>Center for Disease Control and Prevention of Guangdong Province, Guangzhou 510300, China;*

*<sup>b</sup>School of Chemistry and Chemical Engineering, Sun Yat-sen University, Guangzhou 510275, China*

*<sup>c</sup>China National Accreditation Service for Conformity Assessment, Beijing 100062, China*

\*Corresponding author: Z. X. Zhong

Tel.: +86 20 31051925

Fax: +86 20 31051925

E. mail address: [zzxiong608@126.com](mailto:zzxiong608@126.com)

## Supplementary Table

Table S1

Results of the one-sample Kolmogorov-Smirnov test for Pb and As in samples

| Analyte                    | Pb     |        |        |        | As     |        |       |        |
|----------------------------|--------|--------|--------|--------|--------|--------|-------|--------|
| Sample                     | 1 A    | 1 B    | 2 A    | 2 B    | 1 A    | 1 B    | 2 A   | 2 B    |
| Kolmogorov-Smirnov Z       | 1.486  | 1.340  | 0.786  | 1.089  | 1.211  | 1.373  | 1.220 | 1.153  |
| <i>P</i> -value (2-tailed) | 0.024  | 0.055  | 0.567  | 0.186  | 0.106  | 0.051  | 0.102 | 0.140  |
| Skewness                   | -0.085 | -0.977 | -0.604 | -0.842 | -1.395 | -1.427 | 0.344 | -0.728 |
| Kurtosis                   | 0.888  | 2.172  | 0.864  | 2.562  | 4.858  | 2.536  | 2.361 | 3.650  |

## Supplementary Figures

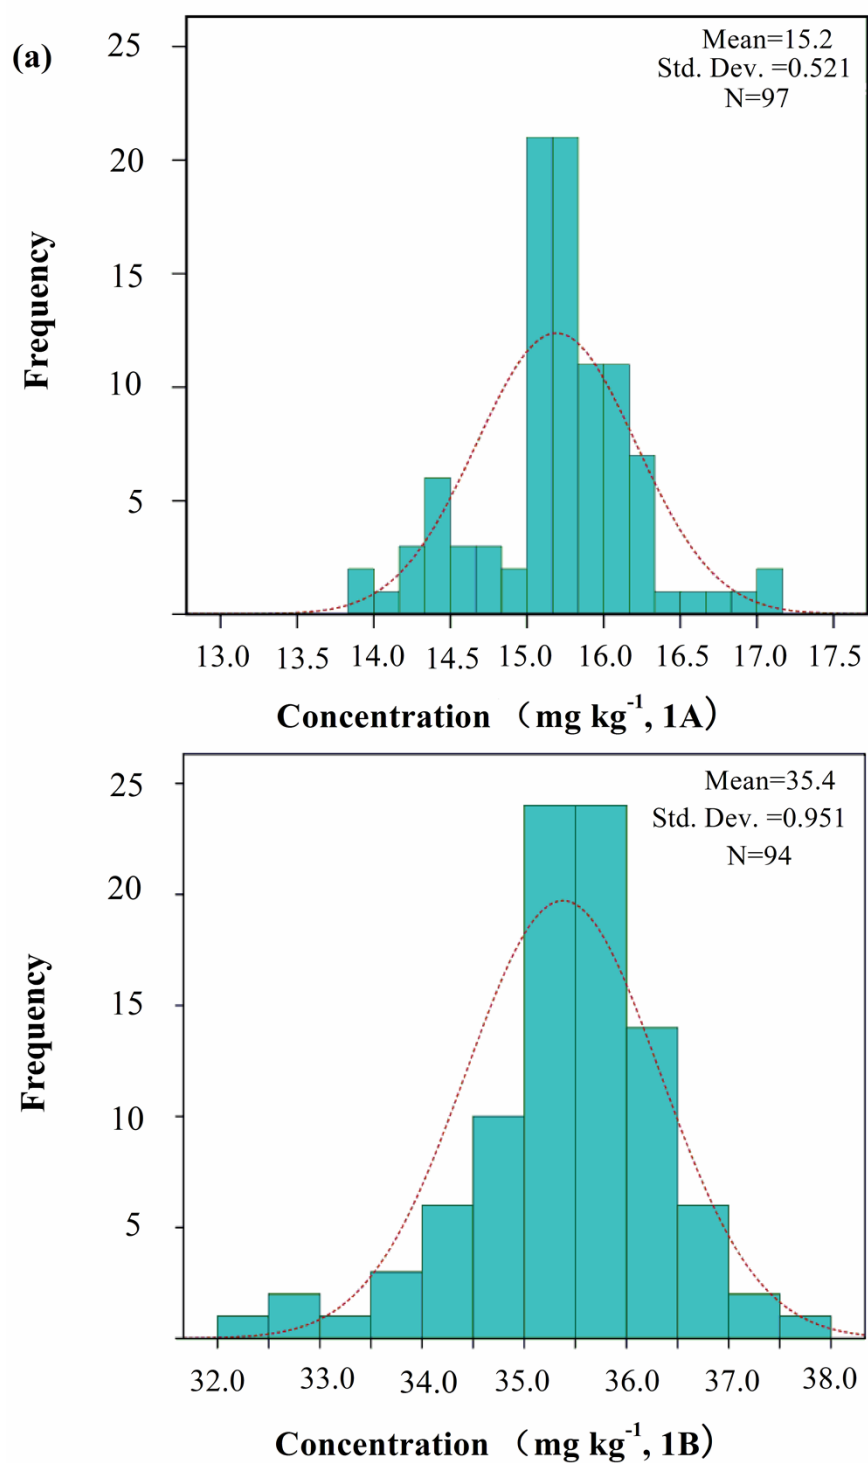

Fig. S1. Histogram and fitted normal distribution of the PT results for (a) Pb in sample 1 A and 1 B. Dotted and solid lines represented the fitted normal distribution and the frequency of analyte in different concentration groups.

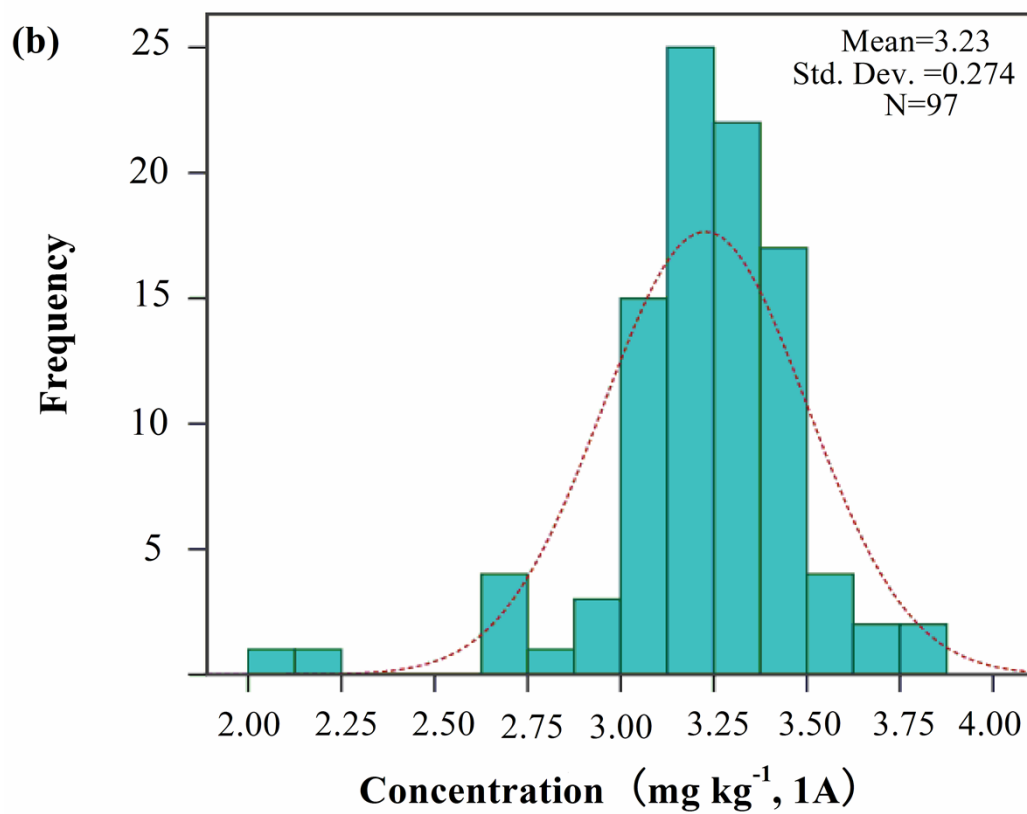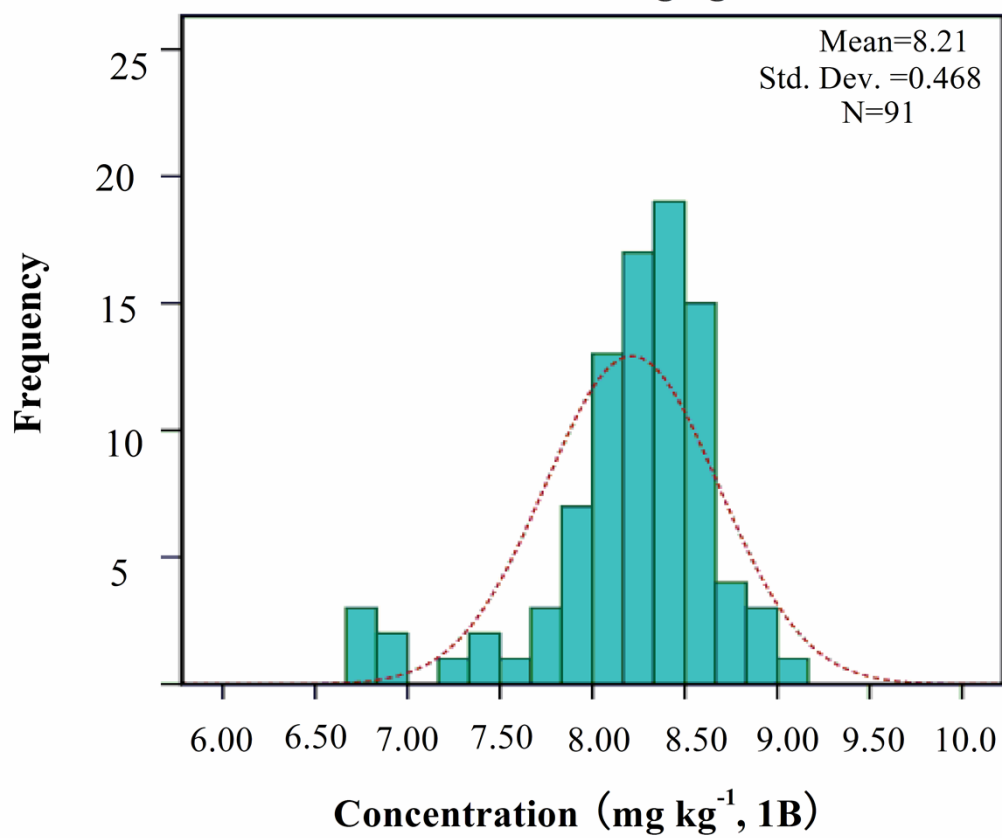

Fig. S1. Histogram and fitted normal distribution of the PT results for (b) As in sample 1 A and 1 B.

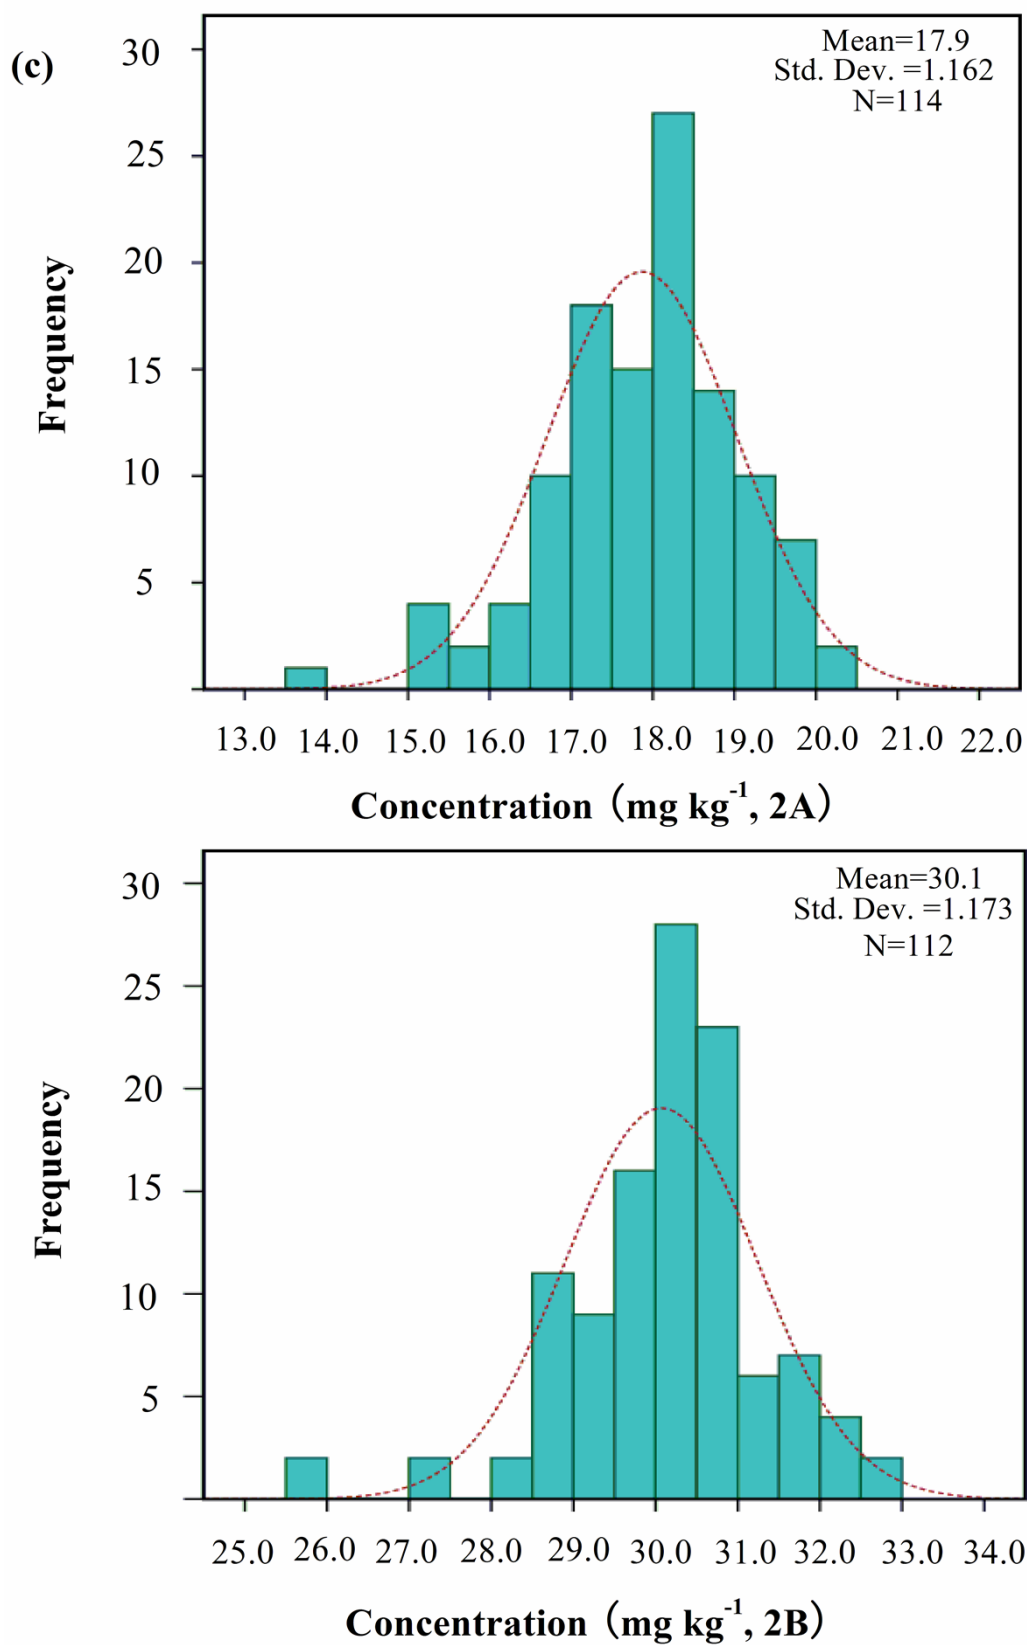

Fig. S1. Histogram and fitted normal distribution of the PT results for (c) Pb in sample 2 A and 2 B.

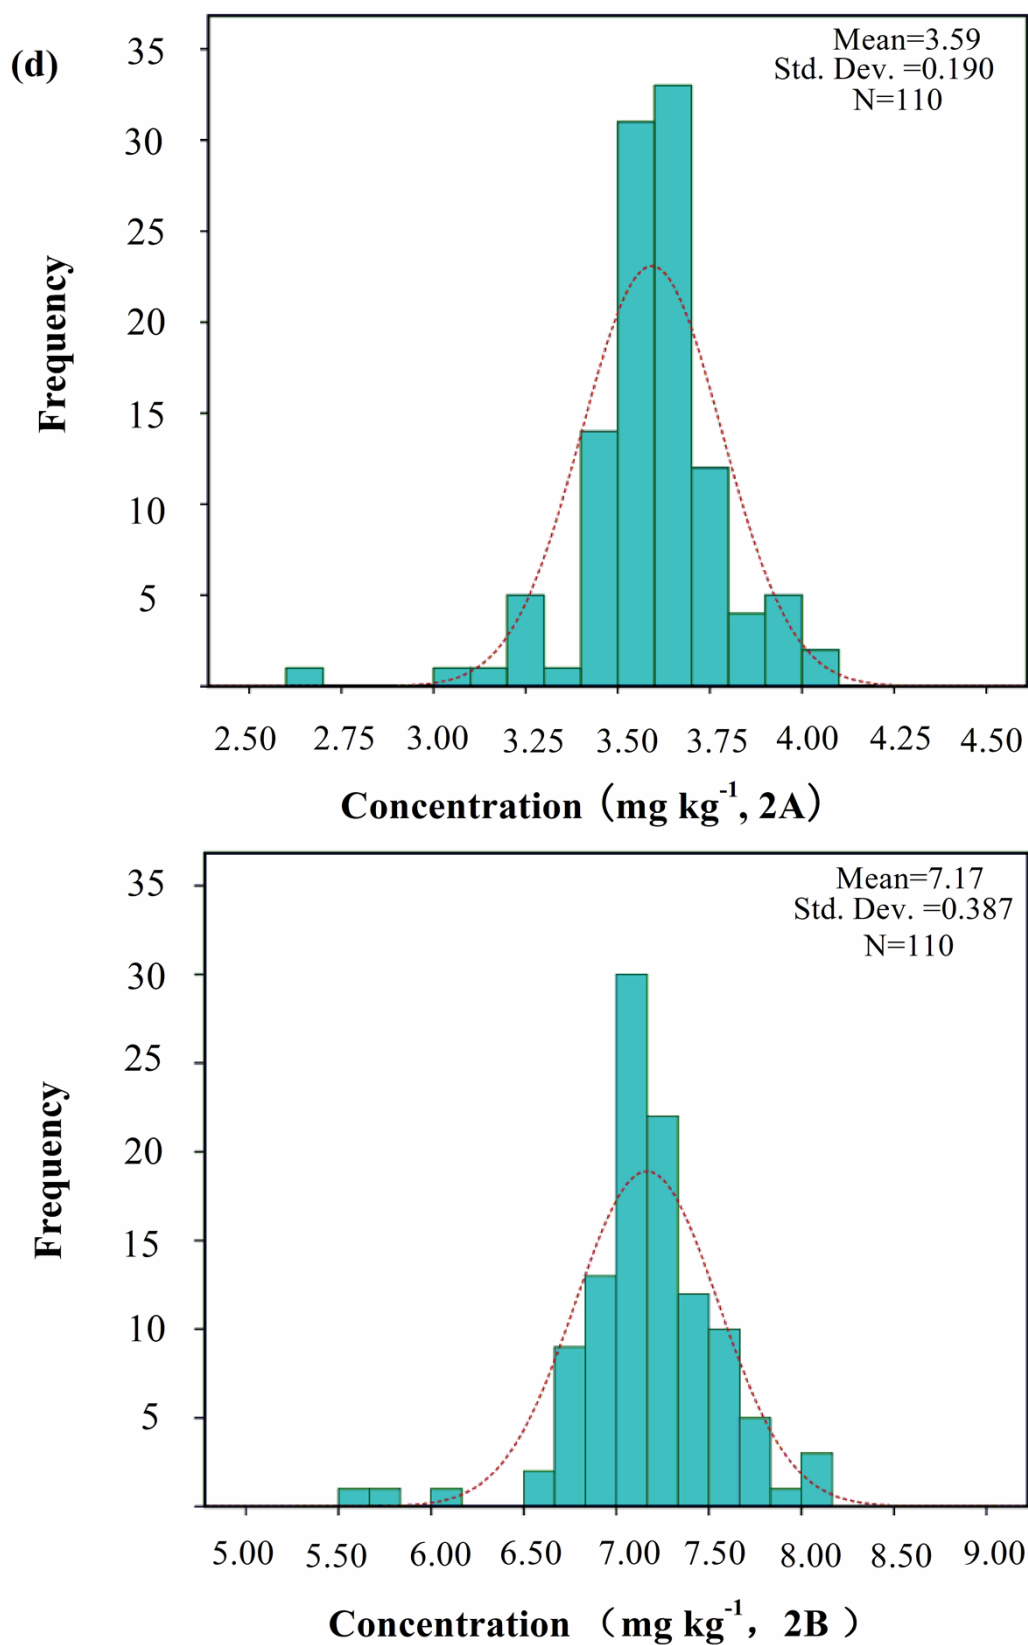

Fig. S1. Histogram and fitted normal distribution of the PT results for (d) As in sample 2 A and 2 B.
